# Supplementary material for: Nanopore enriched hollow carbon nitride nanospheres with extremely high visible-light photocatalytic activity in the degradation of aqueous contaminants of emerging concern
Source: Royal Society of Chemistry journal article supplement (doi:10.1039/c8cy02073f), 2018-11-30

## Electronic supplementary information (ESI)

### Contents

|                                                                                                                                                                                                                                                                |   |
|----------------------------------------------------------------------------------------------------------------------------------------------------------------------------------------------------------------------------------------------------------------|---|
| <b>Fig. S1</b> TEM image of g-C <sub>3</sub> N <sub>4</sub> . .....                                                                                                                                                                                            | 1 |
| <b>Fig. S2</b> Time resolved photoluminescence spectra of g-C <sub>3</sub> N <sub>4</sub> and HCNNSs excited at 337 nm and monitored at emission 500 nm. ....                                                                                                  | 2 |
| <b>Fig. S3</b> Ion chromatographic effluent curve for LEVO photocatalytic degradation products over visible-light irradiating HCNNS-200. Catalyst amount 50 mg; $c_0 = 20$ mg L <sup>-1</sup> ; volume 50 mL; $400\text{ nm} < \lambda < 680\text{ nm}$ . .... | 3 |
| <b>Fig. S4</b> ESI-MS identified intermediate products yielded during the process of visible-light photocatalytic degradation of LEVO. $400\text{ nm} < \lambda < 680\text{ nm}$ ; catalyst amount 50 mg; $C_0 = 20\text{ mg L}^{-1}$ , volume 50 mL. ....     | 4 |

**Fig. S1** TEM image of g-C<sub>3</sub>N<sub>4</sub>.

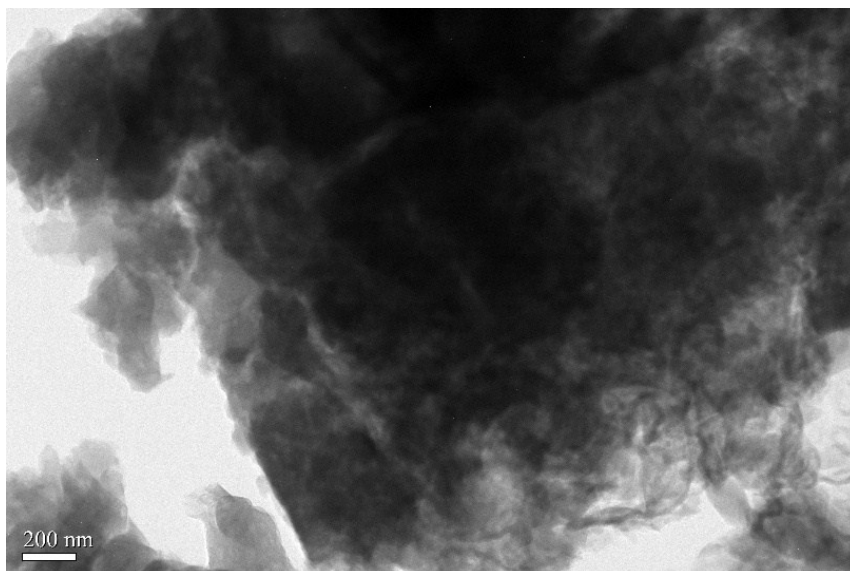

**Fig. S2** Time resolved photoluminescence spectra of g-C<sub>3</sub>N<sub>4</sub> and HCNNSs excited at 337 nm and monitored at emission 500 nm.

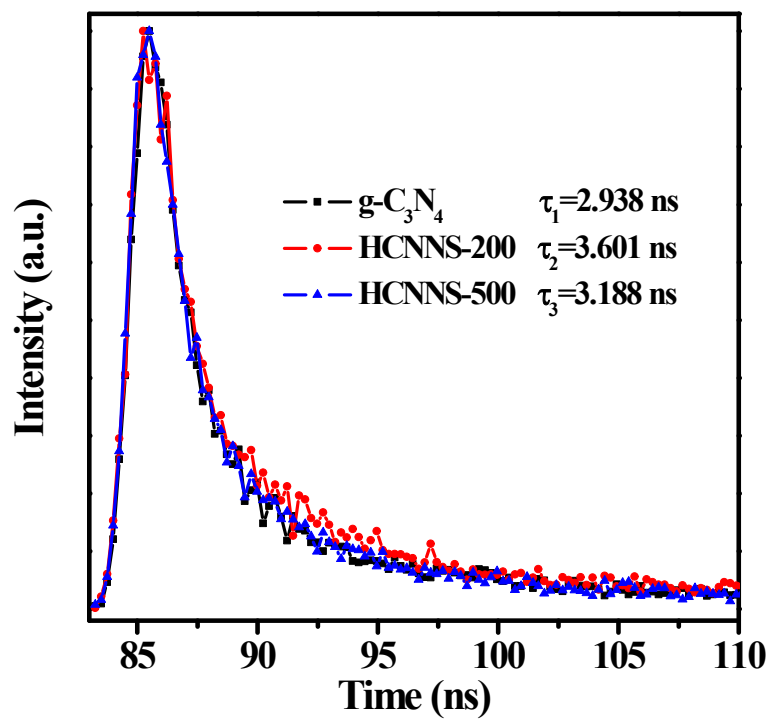

**Fig. S3** Ion chromatographic effluent curve for LEVO photocatalytic degradation products over visible-light irradiating HCNNS-200. Catalyst amount 50 mg;  $c_0 = 20$  mg L<sup>-1</sup>; volume 50 mL; 400 nm <  $\lambda$  < 680 nm.

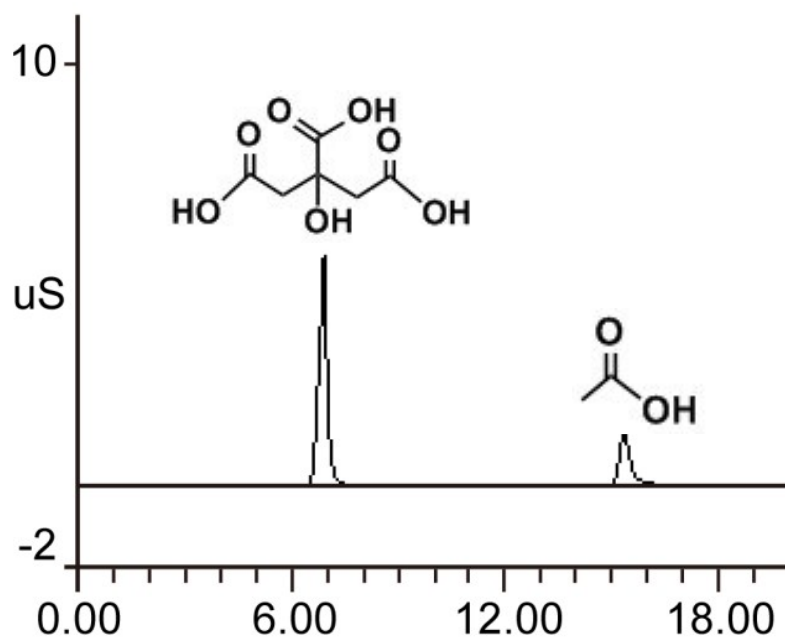

**Fig. S4** ESI-MS identified intermediate products yielded during the process of visible-light photocatalytic degradation of LEVO.  $400\text{ nm} < \lambda < 680\text{ nm}$ ; catalyst amount 50 mg;  $C_0 = 20\text{ mg L}^{-1}$ , volume 50 mL.

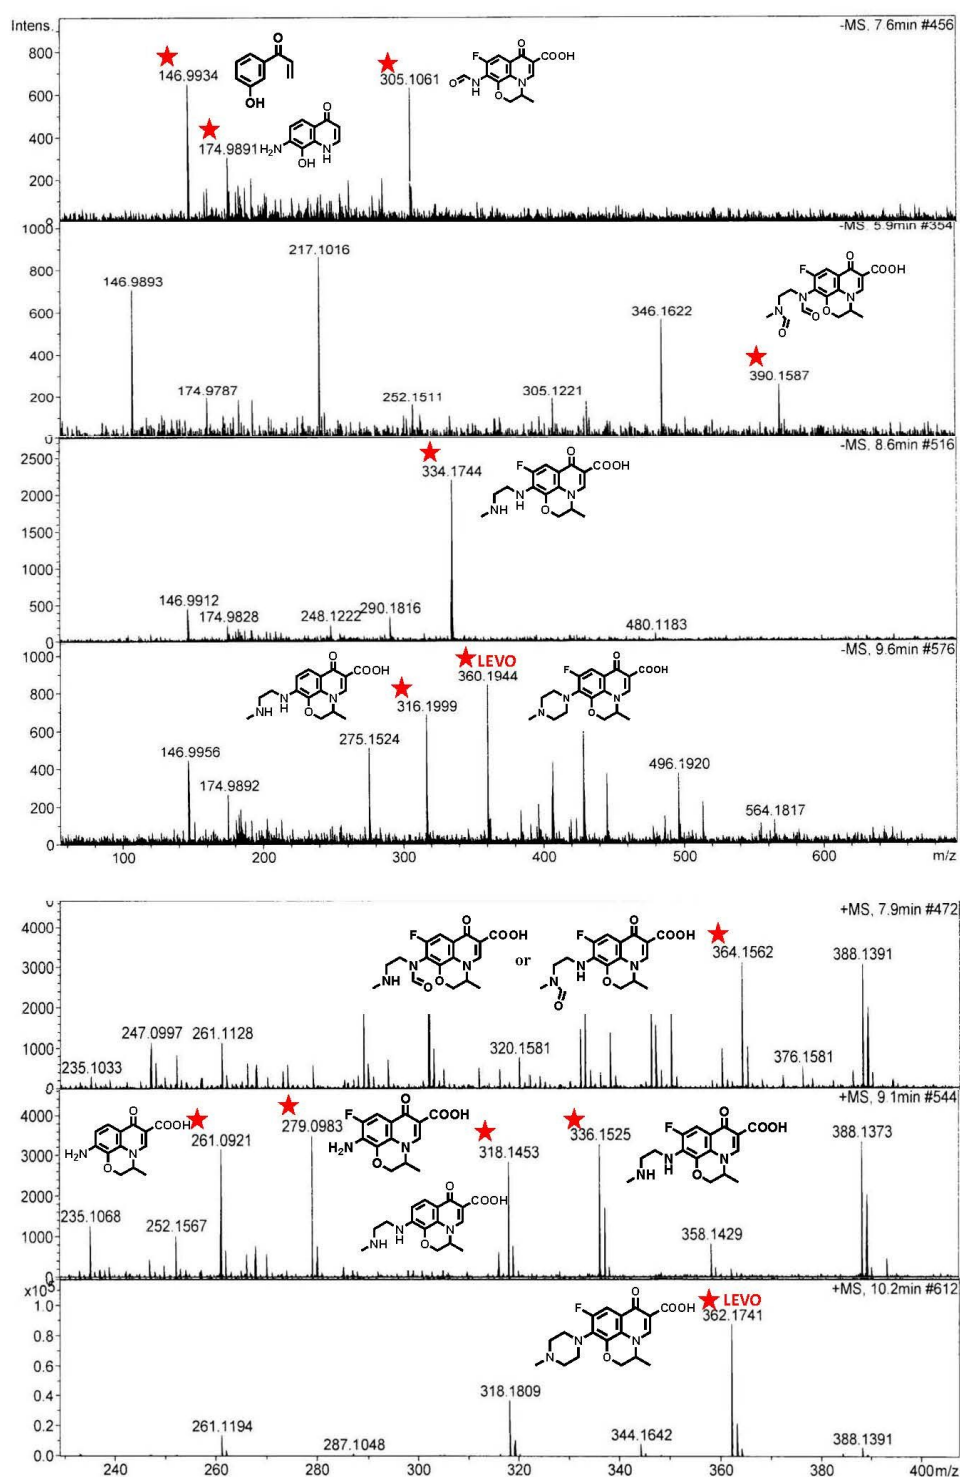

Supplement: c8cy02073f1.pdf [file c8cy02073f1.pdf]
